# Supplementary material for: Evaluating Food Packaging Waste in Schools: A Systematic Literature Review
Source: MDPI journal article supplement (doi:10.3390/ijerph19095607), 2022-05-05
Supplement: s1 [file s1]

**Figure S1: Waste Audit for Sustainable Transitions and Evaluations (WASTE) Instrument**

School Name<sub>Q1</sub>: \_\_\_\_\_ School ID#<sub>Q2</sub>: \_\_\_\_\_ Data Collector<sub>Q3</sub>: \_\_\_\_\_  
 Date<sub>Q4</sub>: \_\_\_\_ / \_\_\_\_ / \_\_\_\_ Lunch Start Time<sub>Q5</sub>: \_\_\_\_ : \_\_\_\_ am/pm Grade of Students<sub>Q6</sub>: \_\_\_\_

**Directions:** For a pre-sort evaluation, collect the weight and/or volume of every waste stream ('waste bin receptacle analyzed'). For a post-sort evaluation, record the 'waste bin receptacle analyzed' and sort each disposable foodware and packaging element (solid waste item) into a separate bucket that is lined with a 6-gallon bag (e.g. all utensils in one bucket, all napkins in a different one). If a bucket becomes full, tie off the bag and insert another bag into the bucket, then keep sorting. Record the 'individual item weight' of each solid waste items from 3 separate samples of that item. Record the aggregate weight (weight of bags) of all items. Make sure to tare the bucket and bag before weighing. Record the number of bags (round to the nearest 0.25) per solid waste item. Tally the number of each item collected. Collect one of each solid waste items (including food serviceware) and place in a bag labeled with the school name, school ID, data collector, and date. Determine the volume collection timing (before waste sort, after it, or N/A) and its process (neatly stacked, tossed into a bin, or N/A).

**Photograph<sub>Q7</sub>:** ☐ <sub>1</sub> A typical meal (beverage/food containers or wrapping, napkins, utensils) ☐ <sub>2</sub> Waste bin receptacles ☐ <sub>3</sub> Waste bin signage

**Waste Bin Receptacles Types<sub>Q8</sub>:** (L) Landfill#<sub>1</sub>\_\_\_\_\_ (R) Recycling #<sub>2</sub>\_\_\_\_\_ (C) Compost#<sub>3</sub>\_\_\_\_\_ (O) Other#:<sub>4</sub>\_\_\_\_\_ Other Describe:<sub>5</sub>\_\_\_\_\_

**Where Material Collected<sub>Q9</sub>:** Kitchen/ back of house<sub>1</sub>\_\_\_\_\_ Cafeteria/ front of house<sub>2</sub>\_\_\_\_\_

**Meal Type<sub>Q10</sub>:** Breakfast<sub>1</sub>\_\_\_\_\_ Lunch<sub>2</sub>\_\_\_\_\_ Snack<sub>3</sub>\_\_\_\_\_ Dinner<sub>4</sub>\_\_\_\_\_

**Volume Data Collection Timing<sub>Q11</sub>:** Before waste sort<sub>1</sub>\_\_\_\_\_ After waste sort<sub>2</sub>\_\_\_\_\_ N/A<sub>3</sub>\_\_\_\_\_

**Volume Data Collection Process\*<sub>Q12</sub>:** Neatly stacked<sub>1</sub>\_\_\_\_\_ Tossed into a bin<sub>2</sub>\_\_\_\_\_ N/A<sub>3</sub>\_\_\_\_\_

**Scale Calibration (500g)<sub>Q13</sub>:** \_\_\_\_ . \_\_\_\_ (g)

**Solid Waste Item Guide:**

(BC) Beverage Container: carton, pouch, cup  
 (FC) Food Container: tray, boat, plate, bowl  
 (W) Wrapping: film plastic lid, tin foil wrap  
 (U) Utensil: fork, spork, spoon, knife, chopsticks  
 (N) Napkin  
 (S) Straws  
 (O) Other

**Material Type Guide:**

(CP) Compostable Plastic: must say "compostable" or inside the chasing arrows symbol is #7/PLA, #7/Other, or #0  
 (CF) Compostable Paper: napkin, paper towel, or fiber item that is labeled "compostable"  
 (P) Plastic: inside the chasing arrows symbol is #1-6 or plastic without a chasing arrows symbol  
 (LP) Lined Paper: milk containers, paper cups, food containers  
 (O) Other: foil, paper-lined foil, waxed paper, tamale husks, etc.

**Notes** (e.g. two different food items have the same packaging, deviations from protocol, waste bin signage or location abnormalities, etc.):<sub>Q14</sub>

\*In collecting volume data, it is possible to stack the items neatly in a bag then calculate the volume or toss them into a bag to emulate typical discard behavior then calculate the volume

| Waste Bin Receptacle Analyzed                                                                            | Solid Waste Item                           | Description                                                                                                                                                                                   | How Provided                                                  | Material Type                               |                                                                             | Individual Item Weight |                       |                       | Aggregate Weight                               | Aggregate Volume                                              | Spec. Collected  |
|----------------------------------------------------------------------------------------------------------|--------------------------------------------|-----------------------------------------------------------------------------------------------------------------------------------------------------------------------------------------------|---------------------------------------------------------------|---------------------------------------------|-----------------------------------------------------------------------------|------------------------|-----------------------|-----------------------|------------------------------------------------|---------------------------------------------------------------|------------------|
| (L) landfill<br>(R) recycling<br>(C) compost (O) other<br>(N/A) if waste not analyzed from a bin.<br>Q15 | (BC) (FC)<br>(W) (U)<br>(N) (S) (O)<br>Q16 | Include what solid waste item was used for.<br>If there are items that have identical packaging combine them and and note that here (e.g. chicken pot stickers and bean/cheese pupusa)<br>Q17 | (A) automatically<br>(R) by request<br>(SS) self-serve<br>Q18 | (CP)<br>(CF)<br>(P)<br>(LP)<br>(O)<br>Q19.1 | Resin Code / # in recycling symbol<br>(put NA if not on packaging)<br>Q19.2 | Sample 1 (g)<br>Q20.1  | Sample 2 (g)<br>Q20.2 | Sample 3 (g)<br>Q20.3 | Total weight of all collected items (g)<br>Q21 | Total number of __-gallon bags (round to nearest 0.25)<br>Q22 | Check box<br>Q23 |
| L                                                                                                        | U                                          | Fork used for multiple food items                                                                                                                                                             | A                                                             | P                                           | 1                                                                           | 2.5                    | 2.4                   | 2.5                   | _____.g<br>_____.g<br>_____.g<br>_____.g       | 10.25                                                         | ✓                |
|                                                                                                          |                                            |                                                                                                                                                                                               |                                                               |                                             |                                                                             |                        |                       |                       | _____.g<br>_____.g<br>_____.g<br>_____.g       |                                                               |                  |
|                                                                                                          |                                            |                                                                                                                                                                                               |                                                               |                                             |                                                                             |                        |                       |                       | _____.g<br>_____.g<br>_____.g<br>_____.g       |                                                               |                  |
|                                                                                                          |                                            |                                                                                                                                                                                               |                                                               |                                             |                                                                             |                        |                       |                       | _____.g<br>_____.g<br>_____.g<br>_____.g       |                                                               |                  |
|                                                                                                          |                                            |                                                                                                                                                                                               |                                                               |                                             |                                                                             |                        |                       |                       | _____.g<br>_____.g<br>_____.g<br>_____.g       |                                                               |                  |
|                                                                                                          |                                            |                                                                                                                                                                                               |                                                               |                                             |                                                                             |                        |                       |                       | _____.g<br>_____.g<br>_____.g<br>_____.g       |                                                               |                  |
|                                                                                                          |                                            |                                                                                                                                                                                               |                                                               |                                             |                                                                             |                        |                       |                       | _____.g<br>_____.g<br>_____.g<br>_____.g       |                                                               |                  |

**Solid Waste Guide:** (BC) Beverage Container: carton, pouch, cup (FC) Food Container: tray, boat, plate (W) Wrapping (U) Utensil (N) Napkin (S) Straws (O) Other

**Material Type Guide:** (CP) Compostable Plastic: must say “compostable” or inside the chasing arrows symbol is #7/PLA, #7/Other, or #0 (CF) Compostable Fiber: napkin, paper towel, or fiber item that is labeled “compostable” (P) inside the chasing arrows symbol is #1-6 or plastic without a chasing arrows symbol (LP) Lined Paper: milk containers, paper cups, food containers (O) Other: foil, paper-lined foil, waxed paper, tamale husks, etc.

School ID#<sub>Q2</sub>: \_\_\_\_\_ Data Collector<sub>Q3</sub>: \_\_\_\_\_ Date<sub>Q4</sub>: \_\_\_\_ / \_\_\_\_ / \_\_\_\_

| Waste Bin Receptical Analyzed                                                                            | Solid Waste Item                           | Description                                                                                                                                                                                   | How Provided                                                  | Material Type                               |                                                                             | Individual Item Weight |                       |                       | Aggregate Weight                                     | Aggregate Volume                                              | Spec. Collected  |
|----------------------------------------------------------------------------------------------------------|--------------------------------------------|-----------------------------------------------------------------------------------------------------------------------------------------------------------------------------------------------|---------------------------------------------------------------|---------------------------------------------|-----------------------------------------------------------------------------|------------------------|-----------------------|-----------------------|------------------------------------------------------|---------------------------------------------------------------|------------------|
| (L) landfill<br>(R) recycling<br>(C) compost (O) other<br>(N/A) if waste not analyzed from a bin.<br>Q15 | (BC) (FC)<br>(W) (U)<br>(N) (S) (O)<br>Q16 | Include what solid waste item was used for.<br>If there are items that have identical packaging combine them and and note that here (e.g. chicken pot stickers and bean/cheese pupusa)<br>Q17 | (A) automatically<br>(R) by request<br>(SS) self-serve<br>Q18 | (CP)<br>(CF)<br>(P)<br>(LP)<br>(O)<br>Q19.1 | Resin Code / # in recycling symbol<br>(put NA if not on packaging)<br>Q19.2 | Sample 1 (g)<br>Q20.1  | Sample 2 (g)<br>Q20.2 | Sample 3 (g)<br>Q20.3 | Total weight of all collected items (g)<br>Q21       | Total number of __-gallon bags (round to nearest 0.25)<br>Q22 | Check box<br>Q23 |
|                                                                                                          |                                            |                                                                                                                                                                                               |                                                               |                                             |                                                                             |                        |                       |                       | _____.__ g<br>_____.__ g<br>_____.__ g<br>_____.__ g |                                                               |                  |
|                                                                                                          |                                            |                                                                                                                                                                                               |                                                               |                                             |                                                                             |                        |                       |                       | _____.__ g<br>_____.__ g<br>_____.__ g<br>_____.__ g |                                                               |                  |
|                                                                                                          |                                            |                                                                                                                                                                                               |                                                               |                                             |                                                                             |                        |                       |                       | _____.__ g<br>_____.__ g<br>_____.__ g<br>_____.__ g |                                                               |                  |
|                                                                                                          |                                            |                                                                                                                                                                                               |                                                               |                                             |                                                                             |                        |                       |                       | _____.__ g<br>_____.__ g<br>_____.__ g<br>_____.__ g |                                                               |                  |
|                                                                                                          |                                            |                                                                                                                                                                                               |                                                               |                                             |                                                                             |                        |                       |                       | _____.__ g<br>_____.__ g<br>_____.__ g<br>_____.__ g |                                                               |                  |
|                                                                                                          |                                            |                                                                                                                                                                                               |                                                               |                                             |                                                                             |                        |                       |                       | _____.__ g<br>_____.__ g<br>_____.__ g<br>_____.__ g |                                                               |                  |
|                                                                                                          |                                            |                                                                                                                                                                                               |                                                               |                                             |                                                                             |                        |                       |                       | _____.__ g<br>_____.__ g<br>_____.__ g<br>_____.__ g |                                                               |                  |

**Solid Waste Guide:** (BC) Beverage Container: carton, pouch, cup (FC) Food Container: tray, boat, plate (W) Wrapping (U) Utensil (N) Napkin (S) Straws (O) Other

**Material Type Guide:** (CP) Compostable Plastic: must say “compostable” or inside the chasing arrows symbol is #7/PLA, #7/Other, or #0 (CF) Compostable Fiber: napkin, paper towel, or fiber item that is labeled “compostable” (P) inside the chasing arrows symbol is #1-6 or plastic without a chasing arrows symbol (LP) Lined Paper: milk containers, paper cups, food containers (O) Other: foil, paper-lined foil, waxed paper, tamale husks, etc.

School ID#<sub>Q2</sub>: \_\_\_\_\_

Data Collector<sub>Q3</sub>: \_\_\_\_\_

Date<sub>Q4</sub>: \_\_\_\_ / \_\_\_\_ / \_\_\_\_

| Waste Bin Receptical Analyzed                                                                            | Solid Waste Item                           | Description                                                                                                                                                                                   | How Provided                                                  | Material Type                               |                                                                             | Individual Item Weight |                       |                       | Aggregate Weight                                     | Aggregate Volume                                              | Spec. Collected  |
|----------------------------------------------------------------------------------------------------------|--------------------------------------------|-----------------------------------------------------------------------------------------------------------------------------------------------------------------------------------------------|---------------------------------------------------------------|---------------------------------------------|-----------------------------------------------------------------------------|------------------------|-----------------------|-----------------------|------------------------------------------------------|---------------------------------------------------------------|------------------|
| (L) landfill<br>(R) recycling<br>(C) compost (O) other<br>(N/A) if waste not analyzed from a bin.<br>Q15 | (BC) (FC)<br>(W) (U)<br>(N) (S) (O)<br>Q16 | Include what solid waste item was used for.<br>If there are items that have identical packaging combine them and and note that here (e.g. chicken pot stickers and bean/cheese pupusa)<br>Q17 | (A) automatically<br>(R) by request<br>(SS) self-serve<br>Q18 | (CP)<br>(CF)<br>(P)<br>(LP)<br>(O)<br>Q19.1 | Resin Code / # in recycling symbol<br>(put NA if not on packaging)<br>Q19.2 | Sample 1 (g)<br>Q20.1  | Sample 2 (g)<br>Q20.2 | Sample 3 (g)<br>Q20.3 | Total weight of all collected items (g)<br>Q21       | Total number of __-gallon bags (round to nearest 0.25)<br>Q22 | Check box<br>Q23 |
|                                                                                                          |                                            |                                                                                                                                                                                               |                                                               |                                             |                                                                             |                        |                       |                       | _____.__ g<br>_____.__ g<br>_____.__ g<br>_____.__ g |                                                               |                  |
|                                                                                                          |                                            |                                                                                                                                                                                               |                                                               |                                             |                                                                             |                        |                       |                       | _____.__ g<br>_____.__ g<br>_____.__ g<br>_____.__ g |                                                               |                  |
|                                                                                                          |                                            |                                                                                                                                                                                               |                                                               |                                             |                                                                             |                        |                       |                       | _____.__ g<br>_____.__ g<br>_____.__ g<br>_____.__ g |                                                               |                  |
|                                                                                                          |                                            |                                                                                                                                                                                               |                                                               |                                             |                                                                             |                        |                       |                       | _____.__ g<br>_____.__ g<br>_____.__ g<br>_____.__ g |                                                               |                  |
|                                                                                                          |                                            |                                                                                                                                                                                               |                                                               |                                             |                                                                             |                        |                       |                       | _____.__ g<br>_____.__ g<br>_____.__ g<br>_____.__ g |                                                               |                  |
|                                                                                                          |                                            |                                                                                                                                                                                               |                                                               |                                             |                                                                             |                        |                       |                       | _____.__ g<br>_____.__ g<br>_____.__ g<br>_____.__ g |                                                               |                  |
|                                                                                                          |                                            |                                                                                                                                                                                               |                                                               |                                             |                                                                             |                        |                       |                       | _____.__ g<br>_____.__ g<br>_____.__ g<br>_____.__ g |                                                               |                  |

**Solid Waste Guide:** (BC) Beverage Container: carton, pouch, cup (FC) Food Container: tray, boat, plate (W) Wrapping (U) Utensil (N) Napkin (S) Straws (O) Other

**Material Type Guide:** (CP) Compostable Plastic: must say “compostable” or inside the chasing arrows symbol is #7/PLA, #7/Other, or #0 (CF) Compostable Fiber: napkin, paper towel, or fiber item that is labeled “compostable” (P) inside the chasing arrows symbol is #1-6 or plastic without a chasing arrows symbol (LP) Lined Paper: milk containers, paper cups, food containers (O) Other: foil, paper-lined foil, waxed paper, tamale husks, etc.

School ID#<sub>Q2</sub>: \_\_\_\_\_ Data Collector<sub>Q3</sub>: \_\_\_\_\_ Date<sub>Q4</sub>: \_\_\_\_ / \_\_\_\_ / \_\_\_\_
