# Supplementary material for: Evaluating Food Packaging Waste in Schools: A Systematic Literature Review
Source: MDPI journal article supplement (doi:10.3390/ijerph19095607), 2022-05-05
Supplement: s1 [file s1]

**Table S1: All recorded characteristics of reviewed studies.** All recorded characteristics of studies (n=24) included in the systematic review of methods used to evaluate school foodservice packaging waste, sorted by method.

| Author(s)        | Year | Method(s)                      | Objective and Subjective Measures                                                                                                                                                     | Waste Bin Types                                                                                | Observational / Experimental (Study Design) | Country (State/Province) | School Type (Number of Schools Studied) | Environment Assessed | Study Participants                  | Number of Study Participants | Racial and Socio-economic Demographics | Intervention | Intervention Period | Waste Audit Data Collection Period | Publication Type |
|------------------|------|--------------------------------|---------------------------------------------------------------------------------------------------------------------------------------------------------------------------------------|------------------------------------------------------------------------------------------------|---------------------------------------------|--------------------------|-----------------------------------------|----------------------|-------------------------------------|------------------------------|----------------------------------------|--------------|---------------------|------------------------------------|------------------|
| Arazo RA [38]    | 2015 | waste audit (sorted + weighed) | food packaging waste categorized: paper and paper products, hard plastics, soft plastics, glasses, metals, woods, food leftovers, yard, textile, inorganic, hazardous, special wastes | trash                                                                                          | observational (cross-sectional)             | Philippines (--)         | college/university (1)                  | whole school         | students, staff, and administrators | --                           | --                                     | --           | --                  | 4-week sampling period             | peer-reviewed    |
| Castrejon A [34] | 2008 | waste audit (sorted + weighed) | food packaging waste categorized: mixed paper, food scrap and yard waste, cans/bottles, trash                                                                                         | trash, recycling (mixed paper), recycling (cans/bottles), compost (food scraps and yard waste) | observational (cross-sectional)             | US (CA)                  | elementary school (3)                   | whole school         | students                            | 940                          | geographic information; ethnicity      | --           | --                  | one 10-week waste audit            | master's thesis  |

|                    |      |                                         |                                                                                                                                                                                                                                                                                                               |                                                  |                                     |                                 |                               |                 |                                           |        |    |    |    |                                                                        |                   |
|--------------------|------|-----------------------------------------|---------------------------------------------------------------------------------------------------------------------------------------------------------------------------------------------------------------------------------------------------------------------------------------------------------------|--------------------------------------------------|-------------------------------------|---------------------------------|-------------------------------|-----------------|-------------------------------------------|--------|----|----|----|------------------------------------------------------------------------|-------------------|
| Felder MAJ<br>[41] | 2001 | waste<br>audit<br>(sorted +<br>weighed) | food<br>packaging<br>waste<br>categorized:<br>animal<br>bedding,<br>animal<br>waste, cloth,<br>food, wood,<br>glass, paper,<br>plastic (#1, 2,<br>5), plastic<br>(#3, 4, 6, 7)<br>metal<br>(aluminum),<br>metal<br>(ferrous),<br>miscellaneous                                                                | trash,<br>recycling,<br>compost (food<br>scraps) | observational (cross-<br>sectional) | Canada<br>(British<br>Columbia) | college/<br>university<br>(1) | whole<br>school | students,<br>staff, and<br>administrators | --     | -- | -- | -- | three-<br>plus 1-<br>day<br>waste<br>audits<br>per<br>activity<br>area | peer-<br>reviewed |
| Gallardo A<br>[39] | 2016 | waste<br>audit<br>(sorted +<br>weighed) | food<br>packaging<br>waste<br>categorized:<br>plastics (PET,<br>HDPE,<br>LDPE, PP<br>and PS),<br>ferrous<br>metals,<br>nonferrous<br>metals, clean<br>and dirty<br>paper, clean<br>and dirty<br>cardboard,<br>Tetra Brick<br>cartons,<br>glass,<br>organic<br>matter,<br>sanitary<br>cellulose,<br>rubber and | trash                                            | observational (cross-<br>sectional) | Spain (--)                      | college/<br>university<br>(1) | whole<br>school | students,<br>staff, and<br>administrators | 17,792 | -- | -- | -- | two 1-<br>day<br>waste<br>audits                                       | peer-<br>reviewed |

|                           |      |                                |                                                                                                                                          |                                           |                                 |            |                         |              |                                     |         |                        |                                               |                  |                          |               |
|---------------------------|------|--------------------------------|------------------------------------------------------------------------------------------------------------------------------------------|-------------------------------------------|---------------------------------|------------|-------------------------|--------------|-------------------------------------|---------|------------------------|-----------------------------------------------|------------------|--------------------------|---------------|
|                           |      |                                | leather, toxic and hazardous waste, inert waste                                                                                          |                                           |                                 |            |                         |              |                                     |         |                        |                                               |                  |                          |               |
| <b>Hahn NI [14]</b>       | 1997 | waste audit (sorted + weighed) | food packaging waste categorized: carton, pouch, cardboard, metal cans, compost                                                          | trash                                     | experimental (pretest-posttest) | US (LA)    | K-12 (6)                | cafeteria    | students                            | --      | --                     | waste-reduction or recycling adoption program | --               | --                       | peer-reviewed |
| <b>James L [43]</b>       | 2015 | waste audit (sorted + weighed) | food packaging waste categorized: recycling, trash, compost                                                                              | trash, recycling, & compost (food scraps) | experimental (cross-sectional)  | US (WA)    | elementary school (n/a) | whole school | students, staff, and administrators | 847     | ethnicity              | waste-reduction or recycling adoption program | 1 month - 1 year | three 1-day waste audits | peer-reviewed |
| <b>Ramamoorthy R [37]</b> | 2019 | waste audit (sorted + weighed) | food packaging waste categorized: food, paper, silt/ soil/ mud, plastic, wood/ glass/ metal/ textile, clinical/ sanitary, e-waste, other | student waste, campus waste               | observational (cross-sectional) | India (--) | K-12 (487)              | whole school | students                            | 255,248 | geographic information | --                                            | --               | one 5-day waste audit    | peer-reviewed |

|                             |      |                                         |                                                                                                                         |                                                          |                                |         |                       |              |                                     |       |                              |                                                                 |                  |                          |               |
|-----------------------------|------|-----------------------------------------|-------------------------------------------------------------------------------------------------------------------------|----------------------------------------------------------|--------------------------------|---------|-----------------------|--------------|-------------------------------------|-------|------------------------------|-----------------------------------------------------------------|------------------|--------------------------|---------------|
| <b>Ravenelle J [51]</b>     | 2018 | waste audit (sorted + weighed)          | food packaging waste categorized: trash, recycling, food, liquid                                                        | trash, recycling, compost (food scraps and liquid waste) | experimental (cross-sectional) | US (ME) | elementary school (3) | cafeteria    | students                            | 1,669 | geographic information; FRPM | waste-reduction or recycling adoption program                   | <1 month         | three 1-day waste audits | peer-reviewed |
| <b>Schumpert K [48]</b>     | 2012 | waste audit (sorted + weighed)          | food packaging waste categorized: comingled containers, paper, cardboard, food waste, non-recyclable paper              | trash, recycling, compost (food scraps)                  | experimental (cross-sectional) | US (CO) | K-12 (31)             | whole school | students, staff, and administrators | --    | --                           | waste-reduction or recycling adoption program; formal education | 1 month - 1 year | --                       | report        |
| <b>Schupp CL [52]</b>       | 2018 | waste audit (sorted + weighed)          | food packaging waste categorized: reusable food items, compost, recycling, trash                                        | trash, recycling, compost (food scraps)                  | experimental (cross-sectional) | US (WA) | K-12 (18)             | cafeteria    | students, staff, and administrators | 18    | FRPM                         | formal education                                                | >1 year          | one 18-day waste audit   | peer-reviewed |
| <b>Hollingsworth M [50]</b> | 1995 | waste audit (sorted + weighed + volume) | food packaging waste categorized: food, oil/suet, cardboard, paper, metal, plastic, glass, milk component, plate waste, | trash, recycling                                         | experimental (cross-sectional) | US (LA) | K-8 (7)               | cafeteria    | staff and administrators            | 6,513 | --                           | waste-reduction or recycling adoption program                   | <1 month         | two 10-day waste audits  | peer-reviewed |

|                      |      |                                                       |                                                                    |                           |                                 |                      |                     |              |                                     |       |                        |                  |    |       |                       |
|----------------------|------|-------------------------------------------------------|--------------------------------------------------------------------|---------------------------|---------------------------------|----------------------|---------------------|--------------|-------------------------------------|-------|------------------------|------------------|----|-------|-----------------------|
|                      |      |                                                       | miscellaneous                                                      |                           |                                 |                      |                     |              |                                     |       |                        |                  |    |       |                       |
| Baca J [35]          | 2011 | questionnaire                                         | food packaging waste categorized: recycling, trash, compost        | trash, recycling, compost | observational (cross-sectional) | US (Multiple States) | K-12 (n/a)          | cafeteria    | staff and administrators            | 79    | --                     | --               | -- | --    | master's thesis       |
| Chan TC [46]         | 2013 | questionnaire                                         | level of MSW practices                                             | n/a                       | experimental (cross-sectional)  | US (GA)              | K-12 (30)           | whole school | students, staff, and administrators | 30    | ethnicity; FRPM        | formal education | -- | --    | report                |
| Fleckenstein RM [47] | 2016 | questionnaire                                         | food packaging waste categorized: paper, plastic, styrofoam, metal | trash, recycling, compost | observational (cross-sectional) | US (NJ)              | K-12 (34)           | whole school | staff and administrators            | 75    | geographic information | --               | -- | 1 day | doctoral dissertation |
| Iojă CI [36]         | 2012 | questionnaire                                         | level of food packaging knowledge                                  | --                        | observational (cross-sectional) | Romania (--)         | K-12 (457)          | whole school | students, staff, and administrators | 218   | --                     | --               | -- | --    | peer-reviewed         |
| Vitamog AT [42]      | 2012 | questionnaire                                         | level of MSW practices                                             | --                        | observational (cross-sectional) | Philippines (--)     | middle school (n/a) | cafeteria    | students, staff, and administrators | --    | --                     | --               | -- | --    | peer-reviewed         |
| Wie S [17]           | 2003 | multiple methods - modeling, case studies, interviews | economics of labor, fees, and services                             | --                        | observational (cross-sectional) | -- (--)              | K-12 (110)          | cafeteria    | staff and administrators            | 3,000 | --                     | --               | -- | --    | peer-reviewed         |

|                  |      |                                                                |                                                                                                                                                                                                                                                                                               |                                         |                                 |                           |                        |              |                                     |       |      |    |    |                        |               |
|------------------|------|----------------------------------------------------------------|-----------------------------------------------------------------------------------------------------------------------------------------------------------------------------------------------------------------------------------------------------------------------------------------------|-----------------------------------------|---------------------------------|---------------------------|------------------------|--------------|-------------------------------------|-------|------|----|----|------------------------|---------------|
| Smyth DP<br>[40] | 2010 | multiple methods - interviews , waste audit (sorted + weighed) | food packaging waste categorized: paper and paperboard, disposable hot beverage cups, beverage containers, plastics, expanded polystyrene, glass, ferrous metals, non-ferrous metals, organic material, hazardous by-products, electronic waste, non-recyclable other; level of MSW practices | trash, recycling, compost (food scraps) | observational (cross-sectional) | Canada (British Columbia) | college/university (1) | whole school | students, staff, and administrators | 5,038 | --   | -- | -- | two 5-day waste audits | peer-reviewed |
| Palmer S<br>[32] | 2021 | multiple methods - interviews , observations                   | food packaging waste categorized: packaging waste, recycling, food waste; level of MSW practices                                                                                                                                                                                              | trash                                   | observational (cross-sectional) | US (CO)                   | K-12 (13)              | cafeteria    | staff and administrators            | 20    | FRPM | -- | -- | --                     | peer-reviewed |

|                                 |      |                                                                                                                                                                                                                                    |                                                                                                                                                                     |                                                   |                                 |         |                       |              |                                     |     |                                                        |                                                                 |                  |                   |                 |
|---------------------------------|------|------------------------------------------------------------------------------------------------------------------------------------------------------------------------------------------------------------------------------------|---------------------------------------------------------------------------------------------------------------------------------------------------------------------|---------------------------------------------------|---------------------------------|---------|-----------------------|--------------|-------------------------------------|-----|--------------------------------------------------------|-----------------------------------------------------------------|------------------|-------------------|-----------------|
| <b>Prescott MP [49]</b>         | 2019 | multiple methods - food systems awareness poster analysis, questionnaire before and after intervention                                                                                                                             | level of food packaging knowledge                                                                                                                                   | --                                                | experimental (pretest-posttest) | US (CO) | middle school (2)     | cafeteria    | students                            | 268 | ethnicity                                              | formal education                                                | <1 month         | --                | peer-reviewed   |
| <b>Cunningham-Scott CB [44]</b> | 2005 | multiple methods - curbside recycling reports, control comparison and experiment schools identified, intervention, waste audits (sorted + weighed + got volume) before and after intervention, questionnaire, waste hauler reports | food packaging waste categorized: paper, food waste, cardboard, comingled recyclables, non-recyclable trash; participation rates; level of food packaging knowledge | recycling (mixed paper), recycling (cans/bottles) | experimental (pretest-posttest) | US (TX) | elementary school (3) | whole school | students, staff, and administrators | 558 | geographic information; ethnicity; English proficiency | waste-reduction or recycling adoption program; formal education | 1 month - 1 year | 5-day waste audit | master's thesis |

|                  |      |                                                                                                                                                               |                                                                                                                                            |                                                          |                                 |                 |                       |              |                                     |     |                        |                                  |          |                        |                 |
|------------------|------|---------------------------------------------------------------------------------------------------------------------------------------------------------------|--------------------------------------------------------------------------------------------------------------------------------------------|----------------------------------------------------------|---------------------------------|-----------------|-----------------------|--------------|-------------------------------------|-----|------------------------|----------------------------------|----------|------------------------|-----------------|
| Ward MN [18]     | 2014 | multiple methods - case study (tool formation) , test case (informal interviews , intervention, waste audit (sorted + weighed) before and after intervention) | food packaging waste categorized: trash, paper, aluminum, plastics; level of MSW practices                                                 | trash, recycling (mixed paper), recycling (cans/bottles) | experimental (pretest-posttest) | US (NY)         | elementary school (1) | whole school | students, staff, and administrators | --  | geographic information | assessment of recycling programs | <1 month | two 5-day waste audits | peer-reviewed   |
| Cagnassola L [7] | 2016 | modeling                                                                                                                                                      | food packaging waste categorized: reusable trays, reusable utensils, plastic utensils, foam trays, compostable utensils, compostable trays | --                                                       | observational (cross-sectional) | US (NY)         | high school (1)       | cafeteria    | students                            | 450 | --                     | --                               | --       | --                     | master's thesis |
| Prestin A [19]   | 2010 | focus groups                                                                                                                                                  | level of knowledge, attitudes, and behaviors towards recycling                                                                             | --                                                       | observational (cross-sectional) | US (West Coast) | high school (--)      | whole school | students                            | 62  | geographic information | --                               | --       | --                     | peer-reviewed   |
